# Supplementary material for: Wolbachia genome integrated in an insect chromosome: Evolution and fate of laterally transferred endosymbiont genes
Source: HighWire-hosted journal article supplement (doi:10.1101/gr.7144908), 2007-12-11
Supplement: NikohFigS1.pdf [file NikohFigS1.pdf]

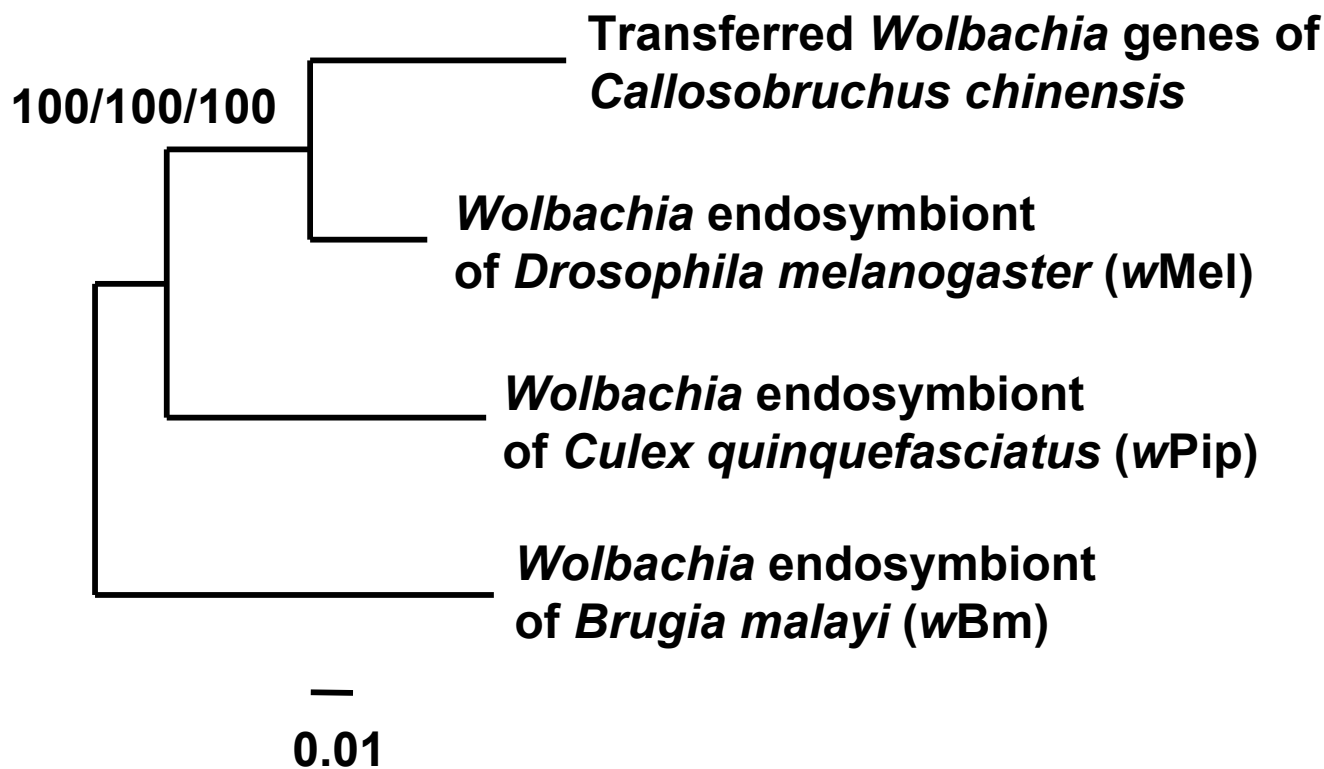

**Figure S1.** Phylogenetic relationship of the transferred *Wolbachia* genes to the *Wolbachia* genes of wMel from a fruit fly, wPip from a mosquito, and wBm from a filarial nematode. A total of 6,653 unambiguously aligned amino acid sites, representing partial sequences of 56 genes (see Table S1), were subjected to the analysis. A neighbor-joining (NJ) tree is shown, while maximum likelihood (ML) and Bayesian analysis (BA) trees exhibited the same topologies. On each of the nodes, support values (NJ/ML/BA) are indicated.
