# Supplementary material for: Wolbachia genome integrated in an insect chromosome: Evolution and fate of laterally transferred endosymbiont genes
Source: HighWire-hosted journal article supplement (doi:10.1101/gr.7144908), 2007-12-11
Supplement: NikohFigS2.pdf [file NikohFigS2.pdf]

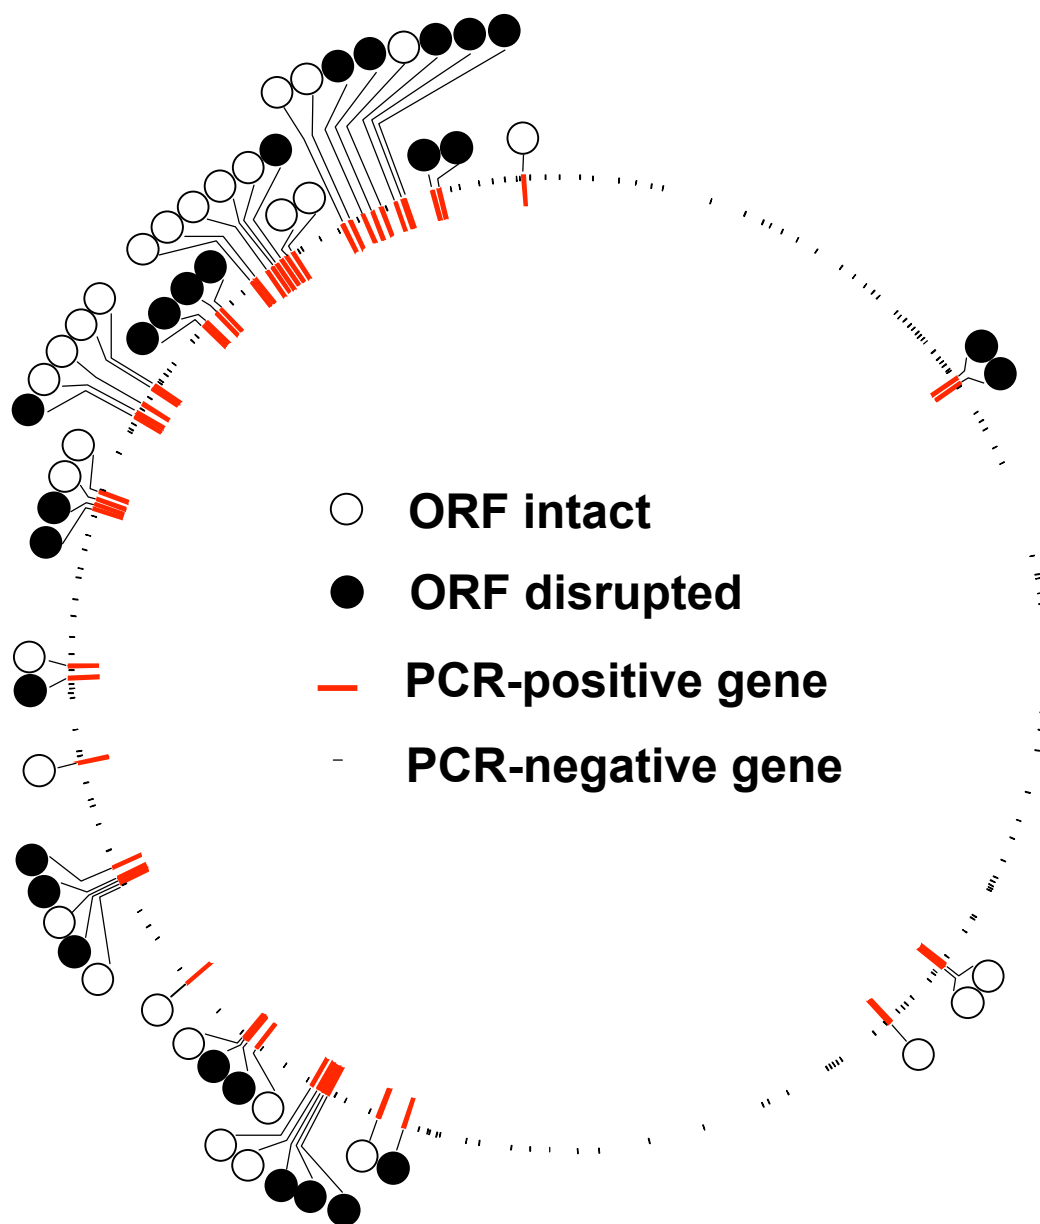

**Figure S2** Structural disruptions detected in the transferred *Wolbachia* genes. In total 57 partial gene sequences were analyzed (see Table S1). The circle is identical to the inner circle of Figure 1. Filled dots, ORFs containing one or more stop codon(s) and/or frame shift(s); open dots, structurally intact ORFs.
