# Supplementary material for: Wolbachia genome integrated in an insect chromosome: Evolution and fate of laterally transferred endosymbiont genes
Source: HighWire-hosted journal article supplement (doi:10.1101/gr.7144908), 2007-12-11
Supplement: NikohFigS3.pdf [file NikohFigS3.pdf]

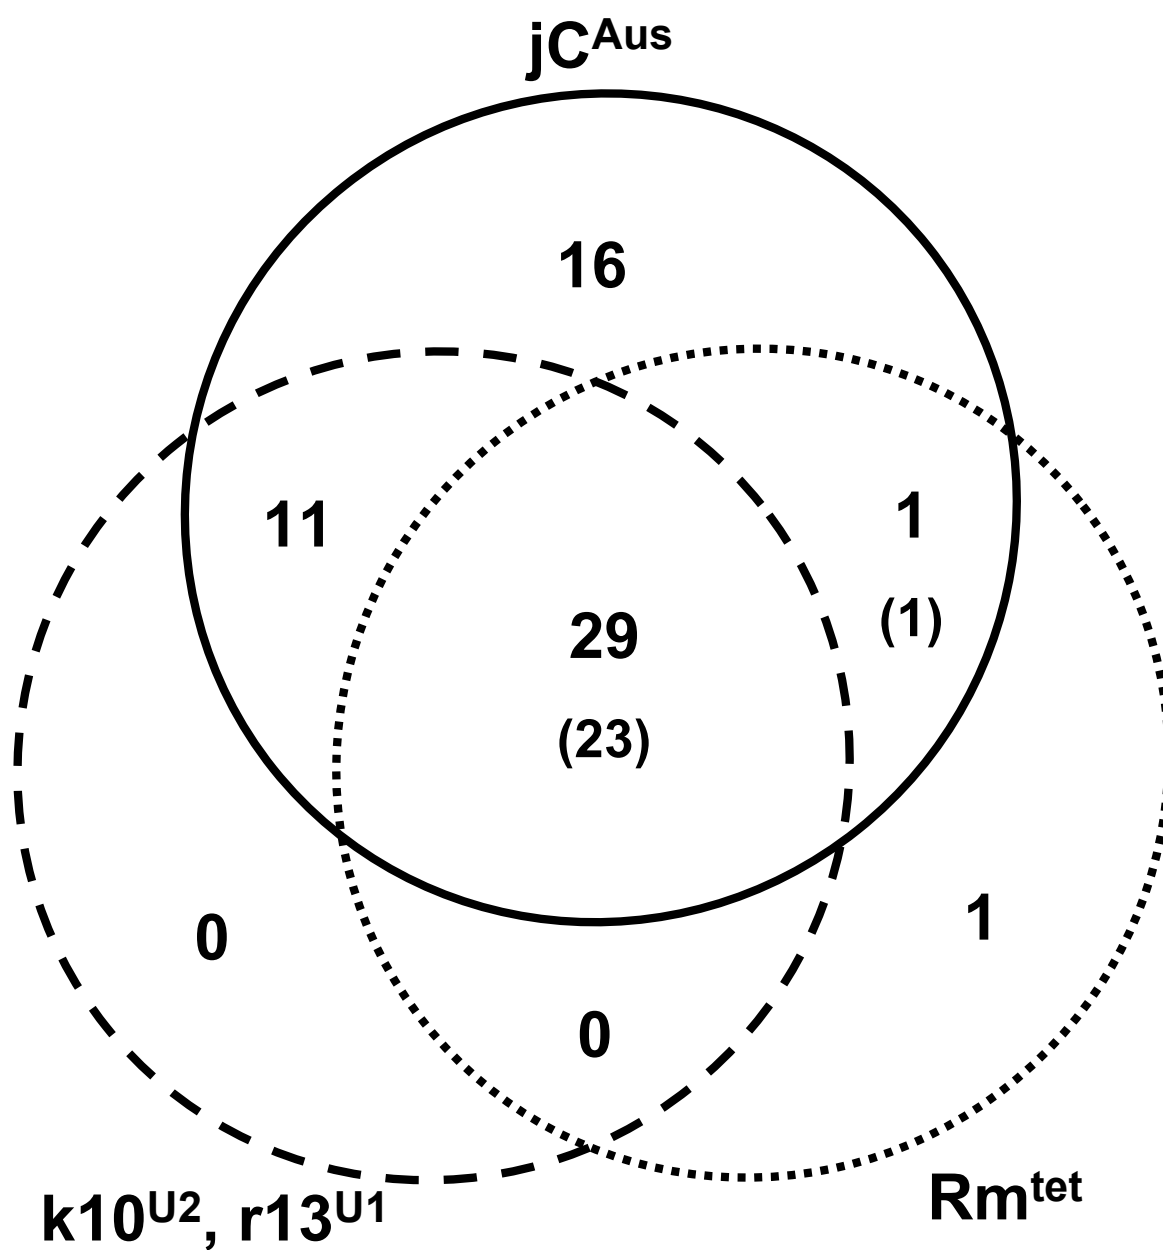

**Figure S3** Distribution of transferred *Wolbachia* genes in the insect strains of different geographic origins. In parentheses are numbers of genes with nucleotide sequence polymorphisms. Also see Table S1.
