# Supplementary material for: Wolbachia genome integrated in an insect chromosome: Evolution and fate of laterally transferred endosymbiont genes
Source: HighWire-hosted journal article supplement (doi:10.1101/gr.7144908), 2007-12-11
Supplement: NikohTableS3.pdf [file NikohTableS3.pdf]

**Table S3. Strains of the Bean Beetles *Callosobruchus* spp. Used in This Study.**

| Strain                                   | Insect species<br>Original locality | Collection year<br>and collector | PCR of <i>wsp</i><br>and <i>ftsZ</i> genes <sup>1</sup> | Infection status<br>based on <i>wsp</i> <sup>2,3</sup> | Description <sup>4</sup>                                                                                         | Transferred<br>genes detected <sup>5</sup> |
|------------------------------------------|-------------------------------------|----------------------------------|---------------------------------------------------------|--------------------------------------------------------|------------------------------------------------------------------------------------------------------------------|--------------------------------------------|
| <b><i>Callosobruchus chinensis</i></b>   |                                     |                                  |                                                         |                                                        |                                                                                                                  |                                            |
| jC                                       | Kyoto, Kyoto<br>Japan               | 1936<br>T. Uchida                | positive                                                | C, O, (A)                                              | A inbred laboratory line established in 1930's;<br>infected with Con and Ori; chromosomal Aus detected.          | -                                          |
| jC <sup>Aus</sup>                        |                                     |                                  | positive                                                | Φ (A)                                                  | A tetracycline-treated line derived from jC;<br><br>no infection; chromosomal Aus detected.                      | 57/205                                     |
| k10                                      | Kasukabe, Saitama<br>Japan          | 1998<br>N. Kondo                 | positive                                                | C, O                                                   | An isofemale line originating from kkC98 population;<br>infected with Con and Ori; chromosomal Aus not detected. | -                                          |
| k10U2                                    |                                     |                                  | negative                                                | Φ                                                      | A tetracycline-treated line derived from k10;<br><br>no infection; chromosomal Aus undetected.                   | 40/205                                     |
| r13                                      | Maruoka, Fukui<br>Japan             | 1998<br>N. Kondo                 | positive                                                | C, O                                                   | An isofemale line originating from mrC98 population;<br>infected with Con and Ori; chromosomal Aus undetected.   | -                                          |
| r13U1                                    |                                     |                                  | negative                                                | Φ                                                      | A tetracycline-treated line derived from r13;<br><br>no infection; chromosomal Aus undetected.                   | 40/205                                     |
| Rm                                       | Kenting,<br>Taiwan                  | 2004<br>N. Kondo                 | positive                                                | O                                                      | A mass-rearing line originating from Kenting, Taiwan;<br>infected with Ori; chromosomal Aus undetected.          | -                                          |
| Rm <sup>tet</sup>                        |                                     |                                  | negative                                                | Φ                                                      | A tetracycline-treated line derived from Rm;<br><br>no infection; chromosomal Aus undetected.                    | 31/205                                     |
| <b><i>Callosobruchus maculatus</i></b>   |                                     |                                  |                                                         |                                                        |                                                                                                                  |                                            |
| hQ                                       | Bunkyo-ku, Tokyo<br>Japan           | 1988<br>M. Shimada               | negative                                                | Φ                                                      | A laboratory line of a congenic species;<br>no infection.                                                        | 0/57                                       |
| <b><i>Callosobruchus rhodesianus</i></b> |                                     |                                  |                                                         |                                                        |                                                                                                                  |                                            |
| ZH                                       | Zimbabwe                            | 1993<br>D. Giga                  | negative                                                | Φ                                                      | A laboratory line of a congenic species;<br>no infection.                                                        | 0/57                                       |

<sup>1</sup>Diagnostic PCR detection of *wsp* and *ftsZ* genes by using universal primers as described [Kondo et al. 2002b].

<sup>2</sup>Diagnostic PCR detection of *wsp* gene from Con, Ori and Aus by using specific primers as described [Kondo et al. 2002b].

<sup>3</sup>C, infected with Con; O, infected with Ori; Φ, no infection; (A), chromosomal Aus detected by specific PCR detection of *wsp* gene.

<sup>4</sup>Geographic information of the populations described previously [Kondo et al. 2002b].

<sup>5</sup>[Number of genes detected by PCR]/[number of genes subjected to PCR assay].
