# Supplementary material for: Wolbachia genome integrated in an insect chromosome: Evolution and fate of laterally transferred endosymbiont genes
Source: HighWire-hosted journal article supplement (doi:10.1101/gr.7144908), 2007-12-11
Supplement: NikohTableS4.pdf [file NikohTableS4.pdf]

**Table S4** Nucleotide and INDEL difference between reference and another copies.

| Gene           | Nucleotide Substitution | Insertion or Deletion | Nucleotide Substitution Sites (Position["base of reference copy "/"base of another copy"])                                                                                                | INDEL Sites <sup>1</sup>                    |
|----------------|-------------------------|-----------------------|-------------------------------------------------------------------------------------------------------------------------------------------------------------------------------------------|---------------------------------------------|
| <i>araD</i>    | 2                       | 0                     | 39[c/a],115[t/c]                                                                                                                                                                          | 202[del2],266[in12]                         |
| <i>gltP</i>    | 3                       | 2                     | 130[g/c],201[t/a],406[t/a]                                                                                                                                                                |                                             |
| <i>pyrG</i>    | 2                       | 0                     | 139[t/a],140[c/t]                                                                                                                                                                         |                                             |
| <i>cog0590</i> | 3                       | 0                     | 121[t/c],179[g/a],193[t/g]                                                                                                                                                                |                                             |
| <i>rho</i>     | 4                       | 1                     | 45[t/g],292[a/t],377[g/a],393[t/a]                                                                                                                                                        | 439[in12]                                   |
| <i>grpE</i>    | 8                       | 0                     | 98[a/g],101[t/c],110[t/g],118[g/a],119[g/t],165[c/t],179[a/g],184[c/t]                                                                                                                    | 253[in10]<br>220[in7]                       |
| <i>ispB</i>    | 1                       | 0                     | 156[a/g]                                                                                                                                                                                  |                                             |
| <i>trpS</i>    | 3                       | 0                     | 145[a/t],163[c/a],208[a/c]                                                                                                                                                                |                                             |
| <i>radA</i>    | 5                       | 1                     | 37[t/c],45[g/c],86[g/c],130[t/c],236[g/a]                                                                                                                                                 |                                             |
| <i>ftsY</i>    | 6                       | 1                     | 85[c/t],103[g/a],170[c/g],171[c/t],196[t/c],275[a/g]                                                                                                                                      | 37[del10],231[in25]<br>191[del2],308[del2]  |
| <i>hesB</i>    | 0                       | 0                     |                                                                                                                                                                                           |                                             |
| <i>hscA</i>    | 21                      | 2                     | 36[t/a],82[a/g],92[t/c],138[a/g],145[c/t],158[t/g],183[g/a],198[a/c],203[a/g],207[c/g],231[a/c],237[c/t],264[c/g],277[a/c],289[c/t],318[t/c],337[g/a],363[g/a],411[a/g],434[t/c],472[g/a] |                                             |
| <i>afuA</i>    | 7                       | 2                     | 149[g/a],190[c/a],249[t/c],255[a/c],272[c/t],304[t/a],309[a/g]                                                                                                                            |                                             |
| <i>qor</i>     | 0                       | 0                     |                                                                                                                                                                                           | 196[in3]<br>89[del55],290[del4]<br>297[in2] |
| <i>fabH</i>    | 4                       | 0                     | 172[t/a],190[t/a],292[t/c],297[t/a]                                                                                                                                                       |                                             |
| <i>dxr</i>     | 0                       | 1                     |                                                                                                                                                                                           |                                             |
| <i>mutM</i>    | 0                       | 0                     |                                                                                                                                                                                           |                                             |
| <i>rluA</i>    | 7                       | 2                     | 46[t/a],61[t/c],233[t/a],236[g/a],239[g/t],294[a/t],340[a/t]                                                                                                                              | 297[in2]                                    |
| <i>pgk</i>     | 15                      | 1                     | 64[g/a],107[g/a],108[c/a],128[a/g],135[a/c],137[a/g],183[g/a],188[c/t],206[g/t],251[c/t],295[c/t],300[t/a],301[t/a],303[g/a],317[g/t]                                                     |                                             |
| <i>lolE</i>    | 0                       | 0                     |                                                                                                                                                                                           |                                             |
| <i>atpG</i>    | 3                       | 0                     | 41[g/t],70[a/g],487[g/a]                                                                                                                                                                  |                                             |

|                |    |   |                                                                                                                                                                              |                     |
|----------------|----|---|------------------------------------------------------------------------------------------------------------------------------------------------------------------------------|---------------------|
| <i>clpA</i>    | 19 | 1 | 6[a/g],36[t/c],69[a/g],116[a/g],149[g/c],156[t/g],159[g/a],161[a/t],183[c/t],184[t/t],195[t/c],217[t/c],<br>240[a/g], 242[c/a],280[g/t], 303[a/g],314[a/g],322[c/t],325[t/c] | 187[in2]            |
| <i>pyrD</i>    | 1  | 0 | 129[c/t]                                                                                                                                                                     |                     |
| <i>bfr</i>     | 3  | 0 | 134[c/t],226[a/c],284[g/t]                                                                                                                                                   |                     |
| <i>ftsH</i>    | 2  | 0 | 214[c/t],215[c/t]                                                                                                                                                            |                     |
| <i>cog2317</i> | 2  | 0 | 49[c/a],245[g/t]                                                                                                                                                             |                     |
| <i>mreB</i>    | 0  | 0 |                                                                                                                                                                              |                     |
| <i>ftsI</i>    | 12 | 0 | 9[c/t],41[a/g],64[a/g],161[a/g],177[a/g],202[c/t],324[a/c],419[a/g],489[g/a],490[c/t],533[a/c],537[g/a]                                                                      |                     |
| <i>htpg</i>    | 1  | 2 | 413[t/g]                                                                                                                                                                     | 104[del2],106[del2] |
| <i>dsbG</i>    | 0  | 0 |                                                                                                                                                                              |                     |

Genes which were detected by PCR from all the four strains. Other genes did not show any polymorphic sites except sequencing error. The position of the reference copy, which was used for molecular evolutionary analysis, were shown. The nucleotide sequence of reference copy of each gene was deposited in database.

<sup>1</sup>The number in parenthesis indicates the number of nucleotides, which were deleted from (del) or inserted into (in) the another copy to align the sequence of the copy against the reference sequence.
