# Supplementary material for: Wolbachia genome integrated in an insect chromosome: Evolution and fate of laterally transferred endosymbiont genes
Source: HighWire-hosted journal article supplement (doi:10.1101/gr.7144908), 2007-12-11
Supplement: NikohTableS5.pdf [file NikohTableS5.pdf]

**Table S5** Divergence time between the strains jC<sup>Aus</sup> and Rm<sup>tet</sup>

| Gene                            | Evolutionary distance <sup>1,2</sup>    |                                               | Evolutionary rate <sup>3,4</sup> | Estimated divergence time (MYA) <sup>5,6</sup> |
|---------------------------------|-----------------------------------------|-----------------------------------------------|----------------------------------|------------------------------------------------|
|                                 | jC <sup>Aus</sup> vs. Rm <sup>tet</sup> | <i>D. melanogaster</i> vs. <i>D. simulans</i> |                                  |                                                |
| COI                             | 0.20                                    | 0.20                                          | 0.08                             | 2.5                                            |
| <i>ef1a</i> intron <sup>7</sup> | 0.017                                   | 0.057                                         | 0.023                            | 0.74                                           |

<sup>1</sup>In terms of substitutions per site.

<sup>2</sup>Estimated according to Kimura's two parameter method [Kimura 1980].

<sup>3</sup>In terms of substitutions per site per million years.

<sup>4</sup>Estimated from the evolutionary distance between *D. melanogaster* and *D. simulans* and their divergence time based on biogeography and molecular clocks of multiple loci [Lachaise et al. 1988, Li et al. 1999].

<sup>5</sup>In terms of million years ago.

<sup>6</sup>Estimated under the assumption that the evolutionary rates between the strains are the same as those between *D. melanogaster* and *D. simulans*.

<sup>7</sup>The inserted site of introns of *C. chinensis* were different from that of the *Drosophila* introns.
